# Supplementary material for: Analysis of 1-aminoisoquinoline using the signal amplification by reversible exchange hyperpolarization technique
Source: Royal Society of Chemistry journal article supplement (doi:10.1039/d0an00967a), 2020-01-01
Supplement: d0an00967a1.pdf [file d0an00967a1.pdf]

# Supporting Information

## Analysis of 1-aminoisoquinoline using the Signal Amplification by Reversible Exchange Hyperpolarization technique

Hye Jin Jeong,<sup>a</sup> Sein Min<sup>b</sup> and Keunhong Jeong<sup>\*a</sup>

<sup>a</sup>Department of Chemistry, Korea Military Academy, Seoul 01805, South Korea

<sup>b</sup>Department of Chemistry, Seoul Women's University, Seoul 01797, South Korea

\*Corresponding author: Keunhong Jeong

doas1mind@kma.ac.kr

# Contents

|                                                                                                                                                                                                                                                                                                                                                                       |           |
|-----------------------------------------------------------------------------------------------------------------------------------------------------------------------------------------------------------------------------------------------------------------------------------------------------------------------------------------------------------------------|-----------|
| <b>1. List of figures .....</b>                                                                                                                                                                                                                                                                                                                                       | <b>3</b>  |
| Figure S1 Hyperpolarized $^1\text{H}$ NMR spectrum at earth's magnetic field(0.65G) containing signal of hydride region.....                                                                                                                                                                                                                                          | 3         |
| Figure S2 (A) Thermal $^1\text{H}$ NMR spectrum of the solution containing catalyst $[\text{Ir}(\text{IMes})(\text{COD})\text{Cl}]$ (3.5mM) and 1-AIQ (35mM) in methanol; (B) Hyperpolarized $^1\text{H}$ NMR spectrum of the solution containing catalyst $[\text{Ir}(\text{IMes})(\text{COD})\text{Cl}]$ (3.5mM), 1-AIQ (35mM) in methanol.....                     | 4         |
| Figure S3 (A) Thermal $^1\text{H}$ NMR spectrum of the solution containing catalyst $[\text{Ir}(\text{IMes})(\text{COD})\text{Cl}]$ (3.5mM) and 1-AIQ (35mM) in methylene chloride; (B) Hyperpolarized $^1\text{H}$ NMR spectrum of the solution containing catalyst $[\text{Ir}(\text{IMes})(\text{COD})\text{Cl}]$ (3.5mM), 1-AIQ (35mM) in methylene chloride..... | 5         |
| Figure S4 Thermal $^1\text{H}$ NMR spectrum of the solution containing catalyst $[\text{Ir}(\text{IMes})(\text{COD})\text{Cl}]$ (3.5mM) and 1-AIQ (35mM) in dimethyl sulfoxide; (B) Hyperpolarized $^1\text{H}$ NMR spectrum of the solution containing catalyst $[\text{Ir}(\text{IMes})(\text{COD})\text{Cl}]$ (3.5mM), 1-AIQ (35mM) in dimethyl sulfoxide.....     | 6         |
| Figure S5 $^1\text{H}$ NMR enhancement levels of 1-AIQ with labeled protons versus the applied magnetic field for hyperpolarization. ....                                                                                                                                                                                                                             | 6         |
| Figure S6 $^1\text{H}$ NMR enhancement levels of 1-AIQ with labeled protons for non-deuterated solvents, MeOH, MC, and DMSO, after SABRE in the presence of 0.65 G magnetic field. ....                                                                                                                                                                               | 6         |
| Figure S7 ; $T_1$ relaxation measurement of hyperpolarized 1-AIQ of 0.65 G magnetic field.....                                                                                                                                                                                                                                                                        | 7         |
| <b>2.SABRE of pyridine.....</b>                                                                                                                                                                                                                                                                                                                                       | <b>8</b>  |
| Figure S8 $^1\text{H}$ NMR intensity of pyridine in the presence of 0.65G magnetic field.....                                                                                                                                                                                                                                                                         | 8         |
| Table S1. J-coupling (Hz) between two hydrides and protons in substrate.....                                                                                                                                                                                                                                                                                          | 9         |
| <b>3.Optimized molecular structure of Ir-Py .....</b>                                                                                                                                                                                                                                                                                                                 | <b>9</b>  |
| <b>4.Optimized molecular structure of Ir-1-AIQ .....</b>                                                                                                                                                                                                                                                                                                              | <b>11</b> |
| <b>5.Reference.....</b>                                                                                                                                                                                                                                                                                                                                               | <b>13</b> |

## 1. List of figures

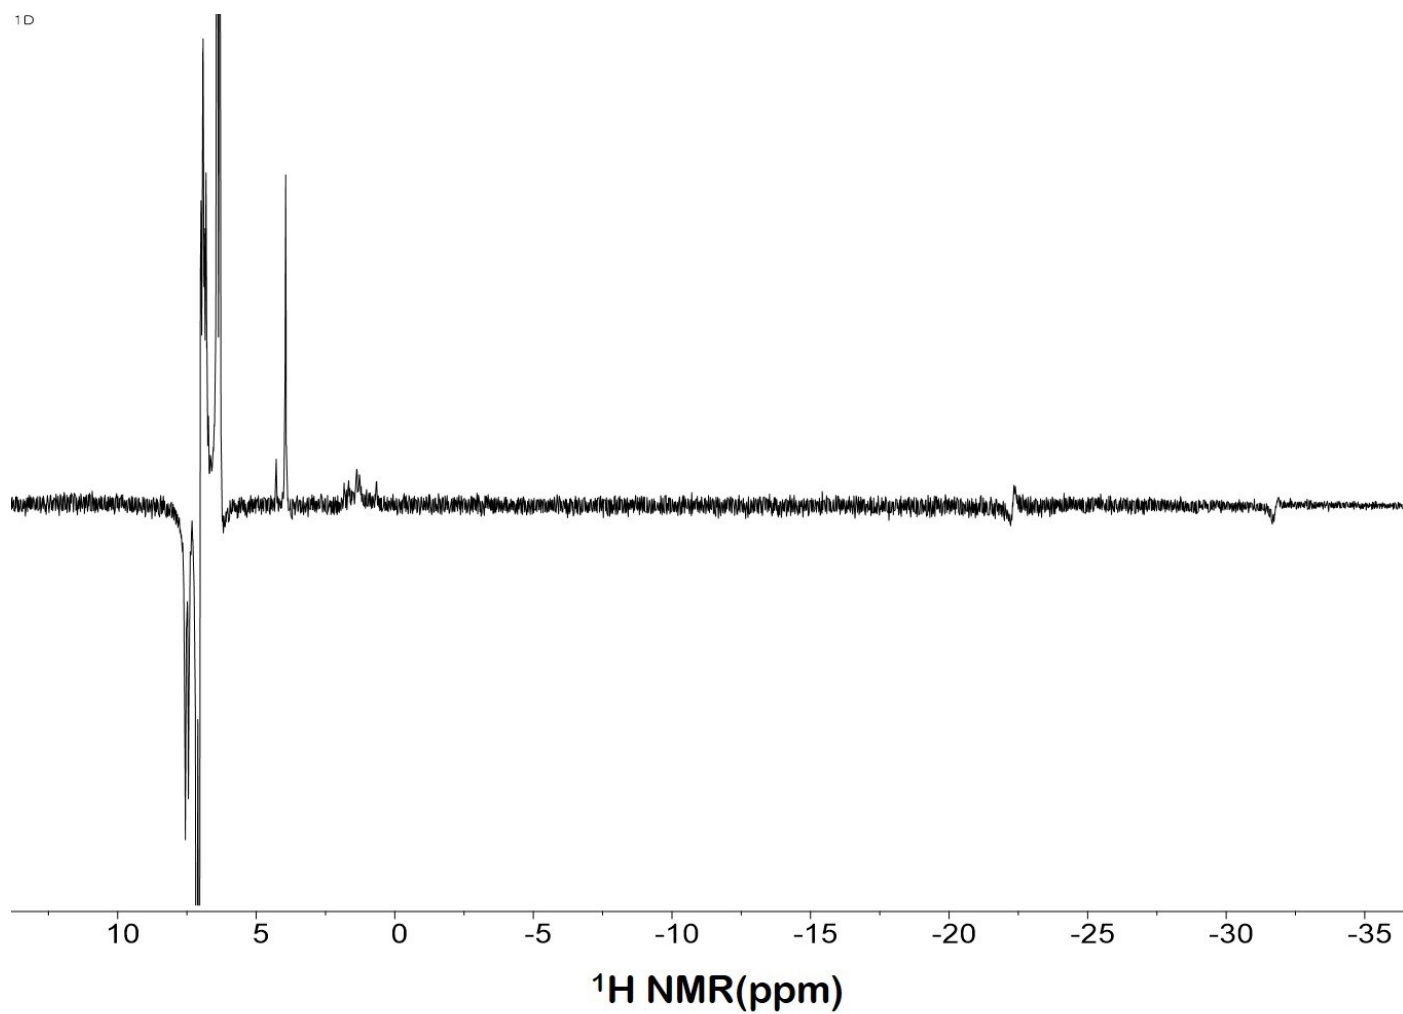

Figure S1 Hyperpolarized <sup>1</sup>H NMR spectrum at earth's magnetic field(0.65G) containing signal of hydride region.

Non-deuterated solvent  
: MeOH

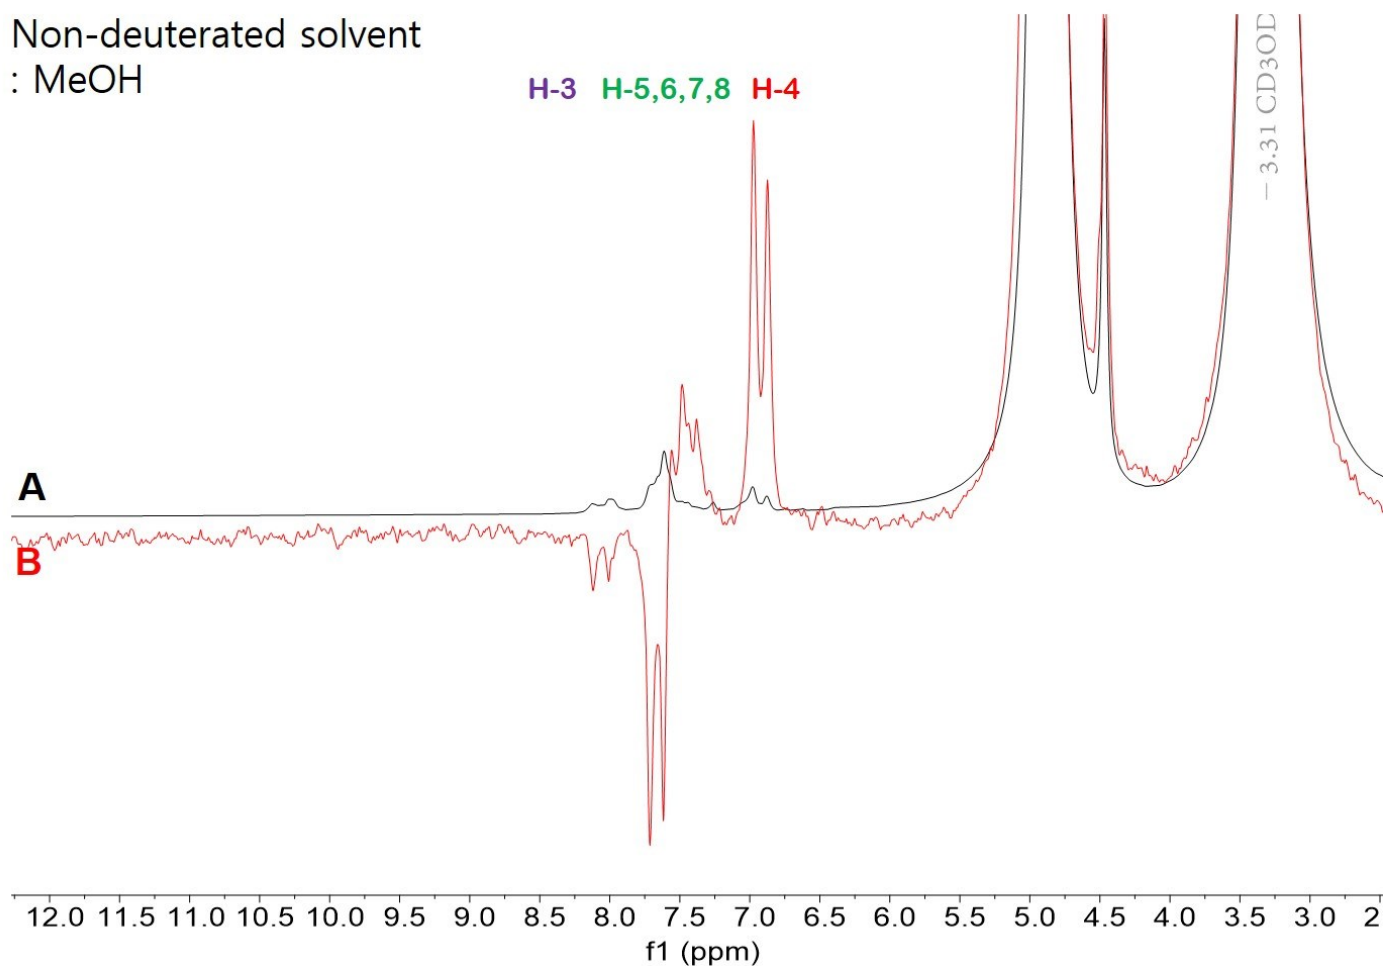

Figure S2 (A) Thermal <sup>1</sup>H NMR spectrum of the solution containing catalyst [Ir(IMes)(COD)Cl] (3.5mM) and 1-AIQ (35mM) in methanol; (B) Hyperpolarized <sup>1</sup>H NMR spectrum of the solution containing catalyst [Ir(IMes)(COD)Cl] (3.5mM), 1-AIQ (35mM) in methanol.

Non-deuterated solvent  
: MC

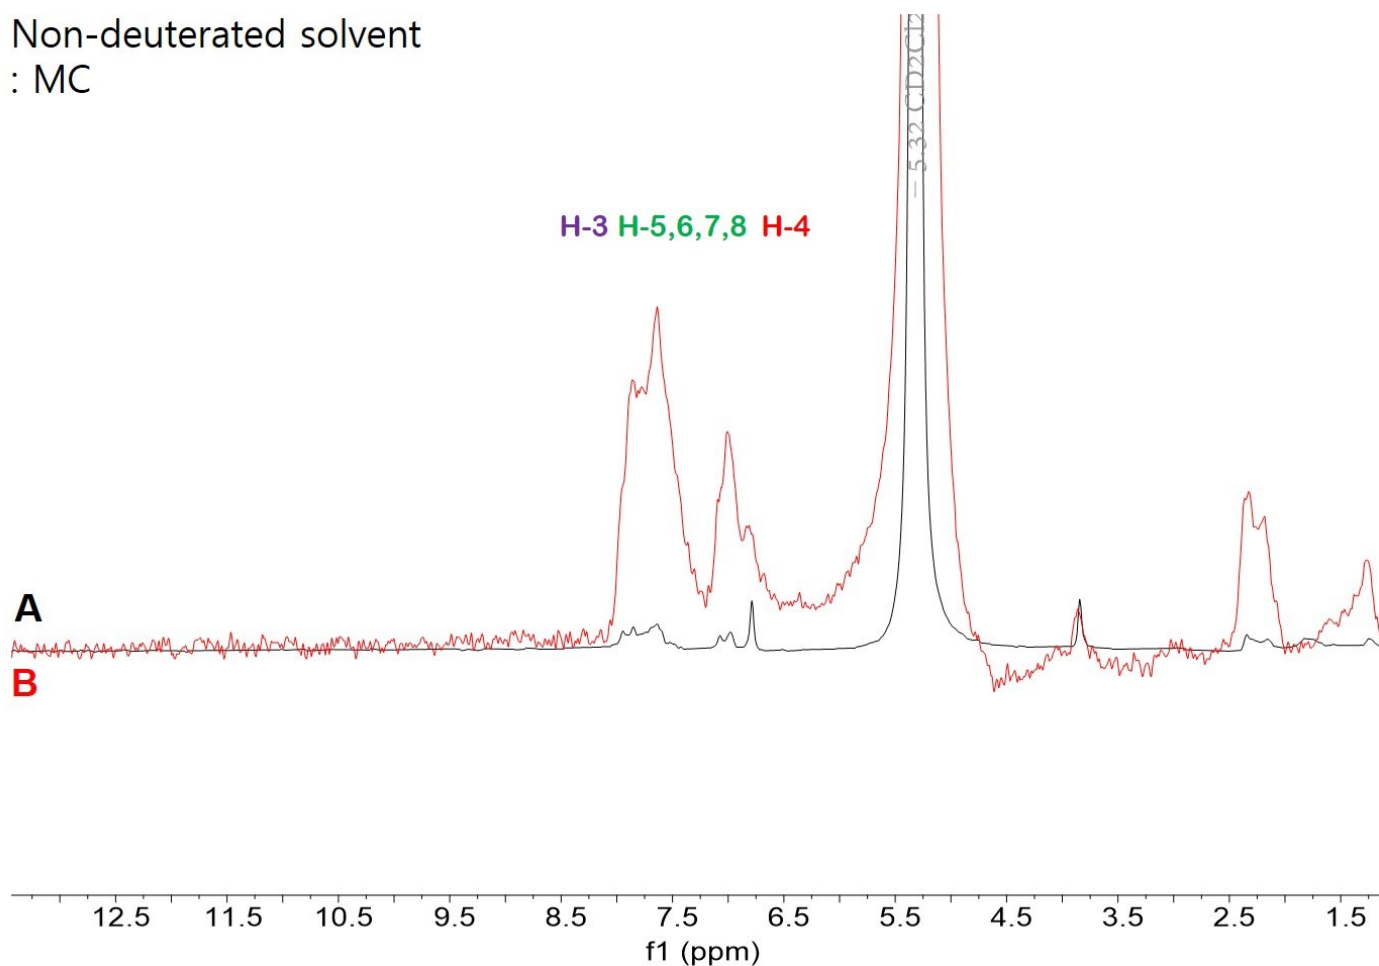

Figure S3 (A) Thermal <sup>1</sup>H NMR spectrum of the solution containing catalyst [Ir(IMes)(COD)Cl] (3.5mM) and 1-AIQ (35mM) in methylene chloride; (B) Hyperpolarized <sup>1</sup>H NMR spectrum of the solution containing catalyst [Ir(IMes)(COD)Cl] (3.5mM), 1-AIQ (35mM) in methylene chloride.

Non-deuterated solvent  
: DMSO

- 2.50 DMSO-d<sub>6</sub>

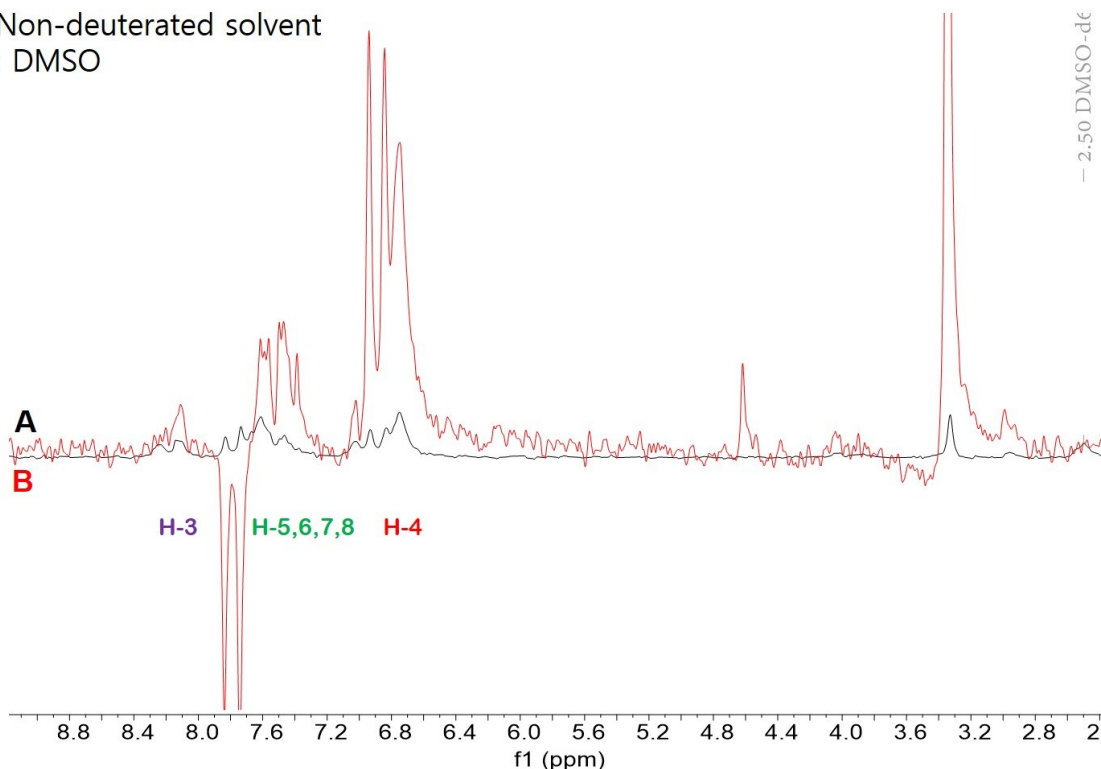

Figure S4 Thermal  $^1\text{H}$  NMR spectrum of the solution containing catalyst  $[\text{Ir}(\text{IMes})(\text{COD})\text{Cl}]$  (3.5mM) and 1-AIQ (35mM) in dimethyl sulfoxide; (B) Hyperpolarized  $^1\text{H}$  NMR spectrum of the solution containing catalyst  $[\text{Ir}(\text{IMes})(\text{COD})\text{Cl}]$  (3.5mM), 1-AIQ (35mM) in dimethyl sulfoxide.

| Magnetic field<br>G | NMR intensity<br>%<br>H-3 | NMR intensity<br>%<br>H-5,6,7,8 | NMR intensity<br>%<br>H-4 |
|---------------------|---------------------------|---------------------------------|---------------------------|
| 0.65                | 0.33                      | 0.51                            | 0.61                      |
| 30                  | 0.1                       | 0.12                            | 0.05                      |
| 50                  | 0.19                      | 0.27                            | 0.17                      |
| 70                  | 0.15                      | 0.21                            | 0.12                      |
| 90                  | 0.11                      | 0.17                            | 0.15                      |

Figure S5  $^1\text{H}$  NMR enhancement levels of 1-AIQ with labeled protons versus the applied magnetic field for hyperpolarization.

| Non-deuterated solvent<br>in 0.65G | NMR intensity<br>%<br>H-4 | NMR intensity<br>%<br>H-5,6,7,8 | NMR intensity<br>%<br>H-3 |
|------------------------------------|---------------------------|---------------------------------|---------------------------|
| MeOH                               | 0.002                     | 0.005                           | 0.003                     |
| MC                                 | 0.002                     | 0.01                            | 0.008                     |
| DMSO                               | 0.004                     | 0.017                           | 0.007                     |

Figure S6  $^1\text{H}$  NMR enhancement levels of 1-AIQ with labeled protons for non-deuterated solvents, MeOH, MC, and DMSO, after SABRE in the presence of 0.65 G magnetic field.

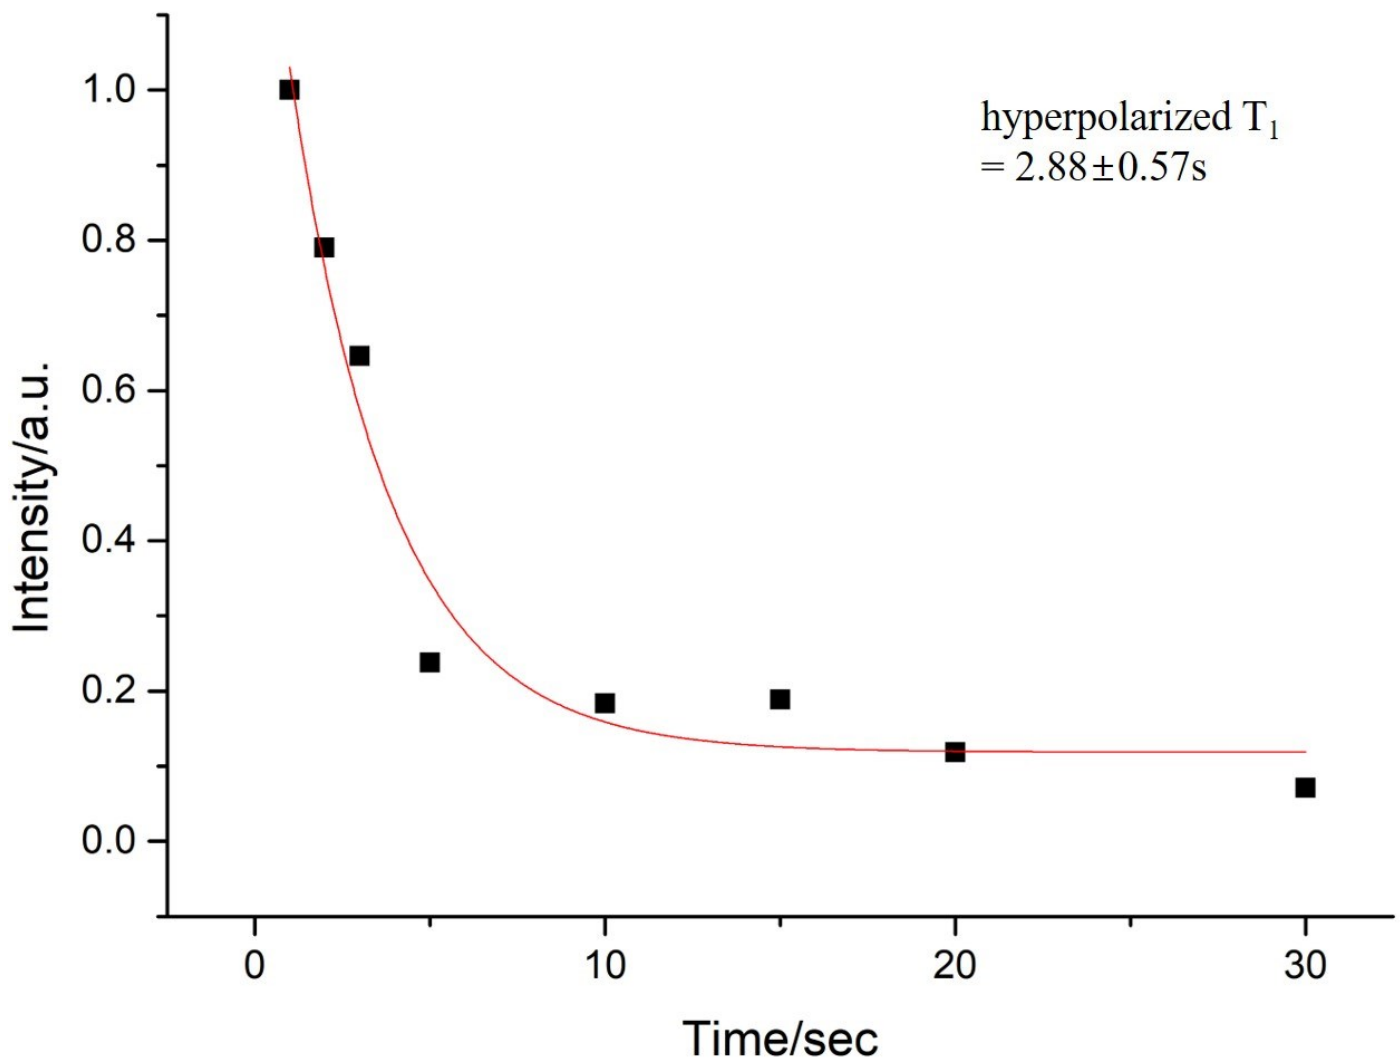

**Figure S7 ;  $T_1$  relaxation measurement of hyperpolarized 1-AIQ of 0.65 G magnetic field.**

$T_1$  relaxation, as known as longitudinal relaxation, is the means by which the net magnetization indicates to the equilibrium over time, and can be calculated mathematically,

$$y = A_1 * \exp(-x/T_1) + y_0^1$$

## 2.SABRE of pyridine

The SABRE experiments were done by the Ir catalyst [Ir(COD)(IMes)(Cl)] (2 mM) in methanol-d6 (0.9 mL for sampling NMR). Approximately 124 mM of pyridine (10  $\mu$ L in 1mL methanol) was hyperpolarized by the polarization transfer.

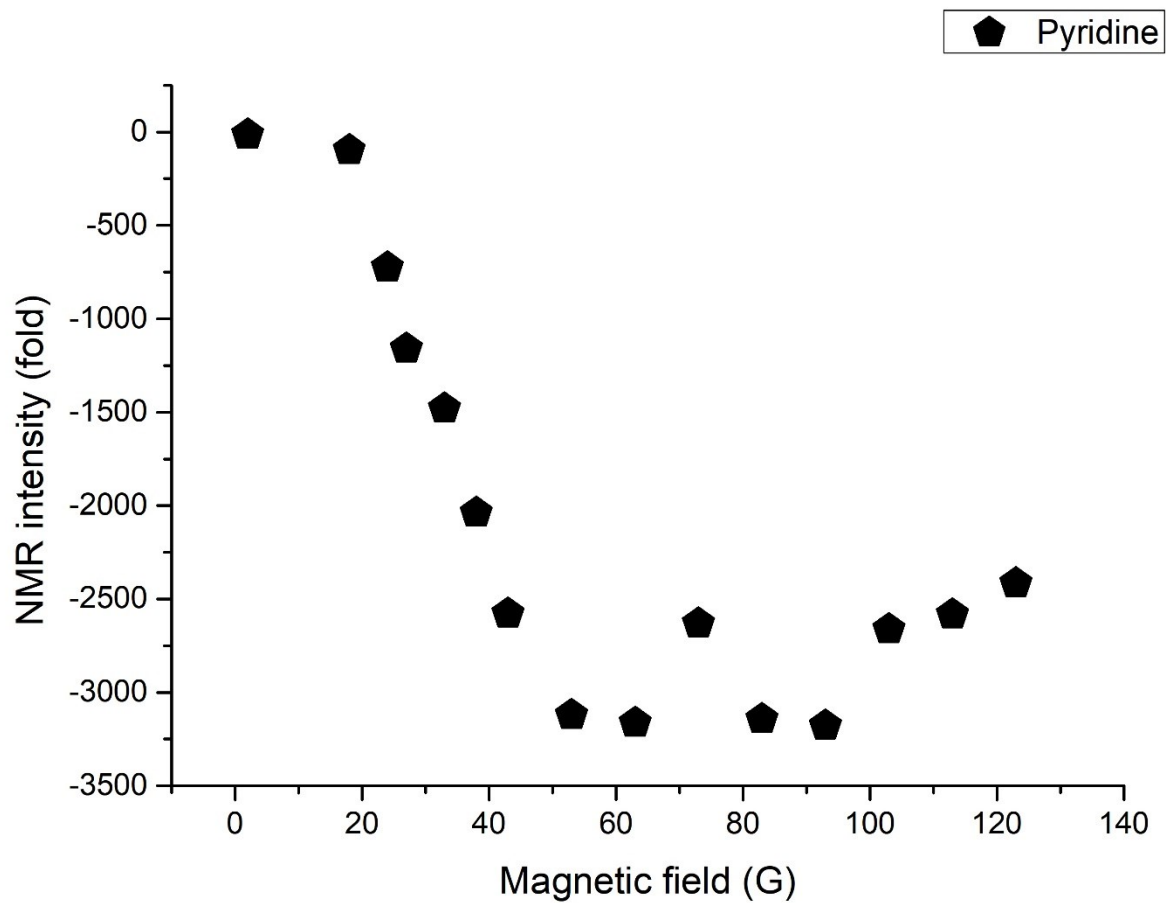

Figure S8  $^1\text{H}$  NMR intensity of pyridine in the presence of 0.65G magnetic field.



Table S1. J-coupling (Hz) between two hydrides and protons in substrate.

| $\rho$ -H <sub>2</sub> | Ir-Py (Py-1), Hz |       |       |        |       |       |
|------------------------|------------------|-------|-------|--------|-------|-------|
|                        | H-3              | H-3'  | H-4   | H-4'   | H-5   | Aver. |
| H-1                    | 1.47             | -0.45 | -0.55 | -0.039 | -1.6  | -0.23 |
| H-2                    | 1.35             | 0.74  | 0.197 | -0.3   | -0.23 | 0.35  |

| $\rho$ -H <sub>2</sub> | Ir-Py (Py-2), Hz |       |      |       |       |       |
|------------------------|------------------|-------|------|-------|-------|-------|
|                        | H-3              | H-3'  | H-4  | H-4'  | H-5   | Aver. |
| H-1                    | 0.88             | 0.65  | 0.19 | -0.11 | -0.43 | 0.24  |
| H-2                    | 1.58             | -0.51 | -0.5 | 0.033 | -0.79 | -0.04 |

| $\rho$ -H <sub>2</sub> | Ir-1-AIQ (1-AIQ-1), Hz |      |        |       |       |       |       |
|------------------------|------------------------|------|--------|-------|-------|-------|-------|
|                        | H-3                    | H-4  | H-5    | H-6   | H-7   | H-8   | Aver. |
| H-1                    | 1.94                   | 0.19 | -0.045 | -0.24 | -0.29 | -0.29 | 0.21  |
| H-2                    | 1.34                   | 0.09 | -0.29  | -0.29 | -0.26 | -0.26 | 0.06  |

| $\rho$ -H <sub>2</sub> | Ir-1-AIQ (1-AIQ-2), Hz |       |       |       |       |       |       |
|------------------------|------------------------|-------|-------|-------|-------|-------|-------|
|                        | H-3                    | H-4   | H-5   | H-6   | H-7   | H-8   | Aver. |
| H-1                    | 0.92                   | -0.1  | -0.31 | -0.36 | -0.21 | -0.24 | -0.05 |
| H-2                    | 0.21                   | -0.28 | -0.27 | -0.2  | -0.25 | 0.07  | -0.12 |

### 3.Optimized molecular structure of Ir-Py

|    |             |            |             |
|----|-------------|------------|-------------|
| Ir | -0.04011900 | 0.51185000 | -0.22155800 |
| C  | 0.55244200  | 4.69312500 | -2.40652100 |
| C  | 0.09521000  | 3.56030300 | -3.16606800 |
| C  | -0.41932000 | 2.44514100 | -2.52565100 |
| N  | -0.35958700 | 2.33494800 | -1.07411700 |
| C  | -0.16795100 | 3.54883700 | -0.33396500 |
| C  | 0.32721600  | 4.67422500 | -0.95932400 |
| H  | 0.93648000  | 5.59003900 | -2.89910900 |
| H  | 0.09529500  | 3.58857100 | -4.26104300 |
| H  | -0.86193900 | 1.59048500 | -3.04098500 |
| H  | -0.38924800 | 3.50382300 | 0.73461200  |
| H  | 0.51153200  | 5.57347300 | -0.36136100 |
| C  | -2.96568300 | 1.61967200 | 3.70078000  |
| C  | -3.31008000 | 2.01038800 | 2.36623100  |
| C  | -2.48988200 | 1.65221500 | 1.29424500  |
| N  | -1.30093500 | 0.93095000 | 1.46585400  |

|   |             |             |             |
|---|-------------|-------------|-------------|
| C | -0.99275900 | 0.51128600  | 2.76830900  |
| C | -1.78601900 | 0.83728600  | 3.87415000  |
| H | -3.58801400 | 1.90504100  | 4.55359600  |
| H | -4.21665500 | 2.59102200  | 2.16734100  |
| H | -2.73443200 | 1.92514000  | 0.26497700  |
| H | -0.10375500 | -0.11928700 | 2.86767500  |
| H | -1.48892000 | 0.47858000  | 4.86554400  |
| H | -1.41392600 | 0.20210100  | -0.99936500 |
| H | 0.86637900  | 0.14797800  | -1.51688000 |
| C | -0.89421300 | -3.67640100 | 0.03284300  |
| C | 0.49368000  | -3.72484100 | -0.02543500 |
| H | -1.62229000 | -4.47949400 | 0.10388000  |
| H | 1.17012700  | -4.57482200 | 0.00081900  |
| C | -0.12457900 | -1.49190000 | -0.11248600 |
| N | -1.27631500 | -2.33653900 | -0.05491100 |
| N | 0.95859600  | -2.41525200 | -0.15509300 |
| C | -2.67558000 | -1.94012400 | -0.14741300 |
| C | -3.48222700 | -1.96405800 | 1.02424400  |
| C | -3.22115900 | -1.65620400 | -1.43971800 |
| C | -4.84893500 | -1.61184400 | 0.89016800  |
| C | -4.58928000 | -1.31066800 | -1.51380500 |
| C | -5.42008200 | -1.26971900 | -0.36108800 |
| H | -5.47990100 | -1.60754700 | 1.78763700  |
| H | -5.02471700 | -1.08973000 | -2.49665800 |
| C | 2.37966200  | -2.12331000 | -0.31985900 |
| C | 2.91909200  | -2.10434800 | -1.63752800 |
| C | 3.19611000  | -1.99270600 | 0.83805900  |
| C | 4.31636600  | -1.91085600 | -1.77287200 |
| C | 4.58748100  | -1.81374000 | 0.64637700  |
| C | 5.16854600  | -1.77061400 | -0.64714300 |
| H | 4.74966300  | -1.88913600 | -2.78080400 |
| H | 5.23136200  | -1.70803500 | 1.52837100  |
| C | -2.93989000 | -2.39055600 | 2.37929600  |
| H | -1.86042800 | -2.19275700 | 2.48112300  |
| H | -3.45889400 | -1.85510600 | 3.19203400  |
| H | -3.10196700 | -3.47449900 | 2.54436900  |
| C | -2.39752800 | -1.80887600 | -2.70909700 |
| H | -2.95991700 | -1.44348600 | -3.58465800 |
| H | -1.44290300 | -1.25488500 | -2.65654700 |
| H | -2.14958700 | -2.87266400 | -2.89516300 |
| C | -6.88295300 | -0.87601400 | -0.47613400 |
| H | -7.43240200 | -1.06726900 | 0.46120100  |
| H | -6.98592900 | 0.20117800  | -0.71185600 |
| H | -7.38712000 | -1.43254100 | -1.28766500 |
| C | 2.60734700  | -2.03490000 | 2.23842000  |
| H | 3.40516500  | -2.02350500 | 2.99931500  |
| H | 1.95915800  | -1.15628000 | 2.41801100  |
| H | 1.99242200  | -2.93882600 | 2.40742300  |
| C | 2.04511000  | -2.31123300 | -2.86440500 |
| H | 1.21653400  | -1.57954400 | -2.90129400 |

|   |            |             |             |
|---|------------|-------------|-------------|
| H | 2.63671200 | -2.20313200 | -3.78866100 |
| H | 1.59080800 | -3.32092400 | -2.87585200 |
| C | 6.67102000 | -1.61596200 | -0.82076500 |
| H | 6.92470900 | -1.15892000 | -1.79328500 |
| H | 7.11151500 | -0.99459000 | -0.02103900 |
| H | 7.17350100 | -2.60229100 | -0.78137600 |
| C | 4.14190600 | 2.64432100  | 1.60853000  |
| C | 4.07615800 | 2.06812500  | 0.31112400  |
| C | 2.91190600 | 1.41123300  | -0.10893900 |
| N | 1.78116900 | 1.28714800  | 0.70293600  |
| C | 1.84927000 | 1.87041300  | 1.96533700  |
| C | 2.98667200 | 2.53537700  | 2.43811000  |
| H | 4.92581600 | 2.12489600  | -0.37655500 |
| H | 2.83909300 | 0.96215300  | -1.10047600 |
| H | 0.94691600 | 1.81071100  | 2.57790500  |
| H | 2.96721600 | 2.97297400  | 3.44130300  |
| H | 5.04054100 | 3.16357300  | 1.95453200  |

#### 4.Optimized molecular structure of Ir-1-AIQ

|    |             |             |             |
|----|-------------|-------------|-------------|
| Ir | 0.46888400  | -0.06586000 | -0.44091900 |
| H  | 0.26408800  | 0.04170200  | -2.03712600 |
| H  | 2.00413100  | -0.36851900 | -0.76176700 |
| C  | 0.89381300  | -4.23867000 | -1.32667600 |
| C  | -0.44448300 | -4.26757000 | -1.01438100 |
| H  | 1.56834300  | -5.02516400 | -1.65191900 |
| H  | -1.16455700 | -5.08061300 | -1.02490800 |
| C  | 0.27763700  | -2.06316500 | -0.73475100 |
| N  | 1.32752200  | -2.90680700 | -1.16613300 |
| N  | -0.81808100 | -2.95174300 | -0.65563400 |
| C  | 2.69038200  | -2.53132400 | -1.53473200 |
| C  | 2.94259200  | -2.13935000 | -2.88083400 |
| C  | 3.74092200  | -2.68080200 | -0.58639100 |
| C  | 4.27850000  | -1.83634900 | -3.24565900 |
| C  | 5.05921200  | -2.37144600 | -1.00269700 |
| C  | 5.35097300  | -1.94327900 | -2.32344600 |
| H  | 4.48725800  | -1.53161800 | -4.27933400 |
| H  | 5.87822100  | -2.47743900 | -0.27972000 |
| C  | -2.23017500 | -2.64629400 | -0.43607000 |
| C  | -2.85525700 | -2.99995400 | 0.79064900  |
| C  | -2.98548700 | -2.16613900 | -1.54830800 |
| C  | -4.25185300 | -2.77280900 | 0.91363000  |
| C  | -4.37085200 | -1.95108600 | -1.37106900 |
| C  | -5.02364300 | -2.23284600 | -0.14163500 |
| H  | -4.74704100 | -3.04709600 | 1.85451300  |
| H  | -4.95928500 | -1.57652300 | -2.21807000 |
| C  | 1.82461500  | -2.05325000 | -3.90700600 |

|   |             |             |             |
|---|-------------|-------------|-------------|
| H | 1.04735100  | -1.32950400 | -3.59565600 |
| H | 2.21551600  | -1.74102400 | -4.89023300 |
| H | 1.31880600  | -3.02851900 | -4.04082100 |
| C | 3.47410400  | -3.15291000 | 0.83245500  |
| H | 2.92773200  | -4.11473600 | 0.85077800  |
| H | 4.41892700  | -3.29158900 | 1.38430100  |
| H | 2.86010900  | -2.42135600 | 1.38785100  |
| C | 6.78192600  | -1.65213400 | -2.74856400 |
| H | 6.81853000  | -1.02587000 | -3.65700100 |
| H | 7.34563300  | -1.13502100 | -1.95116200 |
| H | 7.32446500  | -2.59116500 | -2.97353400 |
| C | -2.34052400 | -1.95376200 | -2.90689700 |
| H | -1.96907400 | -2.90978500 | -3.32554900 |
| H | -3.06475100 | -1.53159600 | -3.62340100 |
| H | -1.47494700 | -1.27023300 | -2.84375000 |
| C | -2.11679700 | -3.64600200 | 1.95560000  |
| H | -1.12076300 | -4.02639500 | 1.67310100  |
| H | -1.98901000 | -2.93076100 | 2.79137900  |
| H | -2.69777300 | -4.49886900 | 2.35120400  |
| C | -6.51194100 | -1.97501600 | 0.02518200  |
| H | -6.94029300 | -2.57564500 | 0.84664100  |
| H | -6.70025000 | -0.90864800 | 0.25876700  |
| H | -7.07025200 | -2.21085000 | -0.89856700 |
| H | -6.67049500 | 1.97636500  | 2.58987300  |
| C | -6.01054400 | 1.93584200  | 1.71667500  |
| C | -6.44395000 | 2.49280900  | 0.47372300  |
| C | -4.74454100 | 1.34284000  | 1.82163800  |
| C | -5.60657800 | 2.44295400  | -0.64748000 |
| H | -7.43270800 | 2.95911400  | 0.40407900  |
| C | -3.86863700 | 1.28423800  | 0.69096200  |
| H | -4.45100100 | 0.92006600  | 2.79005300  |
| C | -4.30977500 | 1.84175700  | -0.56337500 |
| H | -5.93238500 | 2.86886500  | -1.60368800 |
| C | -2.53124300 | 0.69830700  | 0.75205500  |
| N | -1.71323800 | 0.61963500  | -0.34510900 |
| C | -2.17327600 | 1.18278600  | -1.53895900 |
| H | -1.46684300 | 1.13297400  | -2.36790100 |
| H | 3.53800200  | 2.37486000  | 6.39559600  |
| C | 2.98702700  | 1.57765100  | 5.88299200  |
| C | 2.44144500  | 0.51593800  | 6.62570100  |
| C | 2.82740500  | 1.64743900  | 4.46160200  |
| C | 1.72103600  | -0.51869100 | 5.94055300  |
| H | 2.56912800  | 0.47132100  | 7.71158400  |
| C | 2.11366000  | 0.62364900  | 3.76456500  |
| H | 3.21676100  | 2.51980200  | 3.92334000  |
| C | 1.55738500  | -0.47627100 | 4.53537500  |
| H | 1.31570700  | -1.36891400 | 6.50302600  |
| C | 2.00197000  | 0.57014100  | 2.32821800  |
| N | 1.06503400  | -0.31835100 | 1.64795100  |
| C | 0.65375800  | -1.38794200 | 2.40109300  |

|   |             |             |             |
|---|-------------|-------------|-------------|
| H | 0.05924200  | -2.13397000 | 1.86912600  |
| H | 2.85968200  | 6.85791800  | -3.26393600 |
| C | 2.32827500  | 6.33599200  | -2.45965800 |
| C | 1.71149100  | 7.06809900  | -1.43807300 |
| C | 2.27392500  | 4.89791900  | -2.48300600 |
| C | 1.00809100  | 6.36084500  | -0.39871800 |
| H | 1.75605300  | 8.16131700  | -1.42622200 |
| C | 1.59965200  | 4.17738100  | -1.44622200 |
| H | 2.73383500  | 4.37688100  | -3.33127500 |
| C | 0.94853600  | 4.94392800  | -0.39571300 |
| H | 0.51245500  | 6.91790700  | 0.40544400  |
| C | 1.55016600  | 2.74089700  | -1.37894500 |
| N | 0.77454800  | 2.02419200  | -0.38172700 |
| C | 0.18084300  | 2.78465900  | 0.57471200  |
| H | -0.36944200 | 2.24288900  | 1.34740800  |
| C | -3.41244900 | 1.78138000  | -1.68468500 |
| H | -3.69809700 | 2.21373700  | -2.64825300 |
| C | 0.25219600  | 4.19953500  | 0.62172600  |
| H | -0.25489500 | 4.72299000  | 1.43885300  |
| C | 0.88924900  | -1.52078800 | 3.78642700  |
| H | 0.49941100  | -2.40372500 | 4.30517300  |
| N | 2.90668200  | 1.23594700  | 1.51531100  |
| H | 2.81215400  | 1.16800200  | 0.50047700  |
| H | 3.76007800  | 1.62372400  | 1.91854600  |
| N | -2.02708700 | 0.24669800  | 1.94635200  |
| H | -2.57211700 | 0.28025900  | 2.80267700  |
| H | -1.06939400 | -0.10745200 | 1.97817000  |
| N | 2.28051400  | 1.94153100  | -2.24270900 |
| H | 2.94877200  | 2.35177000  | -2.89137900 |
| H | 2.11175800  | 0.93062600  | -2.24062300 |

## 5.Reference

- 1 R. v Shchepin, L. Jaigirdar and E. Y. Chekmenev, *Journal of Physical Chemistry C*, 2018, **122**, 4984–4996.
